# Supplementary material for: Precipitation-fire-functional interactions control biomass stocks and carbon exchanges across the world’s largest savanna
Source: Copernicus journal article supplement (doi:10.5194/egusphere-2024-2497), 2024-08-12
Supplement: Supplementary file 1 [file egusphere-2024-2497-supplement.pdf]

1 Precipitation-fire-functional interactions control biomass stocks and  
2 carbon exchanges across the world's largest savanna

3

4 M Williams<sup>1,2,\*</sup>, D T Milodowski<sup>1,2</sup>, T L Smallman<sup>1,2</sup>, K G Dexter<sup>1</sup>, G C Hegerl<sup>1</sup>, I M McNicol<sup>1</sup>, M  
5 O'Sullivan<sup>3</sup>, C M Roesch<sup>1</sup>, C M Ryan<sup>1,2</sup>, S Sitch and A Valade<sup>4</sup>

6

7

8

1 **Supplement:**

2  
3 Causal effect estimation using Wright’s path method:

4  
5 To estimate causal effects (Runge et al., 2015) we first need to define a causal graph describing all direct  
6 causal links between the variables, based on expert domain knowledge. While most works conduct causal  
7 analysis on time series, in this work we apply a similar framework to a spatial analysis on ensemble-median,  
8 12-year annual means, over the SAW region. For this the spatial 2d-fields are flattened (1d array) and then  
9 treated as a “time series”. Thus, our proposed causal graph cannot have any lagged links, which would  
10 represent spatial correlations. This also requires our graph to be stationary in space, i.e., the graphs include  
11 the impact of climate and fire on variations in vegetation type and function across the SAW region. This  
12 means that the causal links represented in the networks reflect both mechanistic process sensitivities  
13 between the drivers and specific C fluxes that are coded in the model (e.g. GPP is dependent on soil  
14 moisture, which is directly tied to the history of precipitation and evaporation), and emergent spatial effects  
15 that reflect functional variations driven by the SAW climate gradient, as inferred from our spatially explicit  
16 parameter retrieval. Finally, our graph needs to be resolved to not contain any hidden confounding, the  
17 direction of the links must be known, and the graph cannot present any feedback loops.

18 To describe the causal relations between the  $n$  variables in the graph, a structural causal model (SCM) is  
19 defined:

$$20 \quad X_j(t) := f_j(pa(X_j(t)), U_j(t))$$

21  
22 For the linear case, which is assumed in this work, this is given through:

$$23 \quad X_j(t) = \sum_{X_i(t-\tau) \in pa(X_j(t))} \alpha_{X_i, X_j, \tau} X_i(t - \tau) + U_j(t)$$

24  
25 for  $j \in [1: n]$ .  $f_j$  is a linear function, that estimates the value of  $X_j(t)$  based on its direct causal parents  $pa(X_j(t))$   
26  $= (X_i(t - \tau))_i$ .  $\alpha_{X_i, X_j, \tau}$  are referred to as the path coefficients or linear direct causal effects (in the linear case)  
27 and describe the direct causal effect of the parent variable  $X_i(t)$  on the variable  $X_j(t)$  at lag  $\tau$ .  $U_j$  is a jointly  
28 independently distributed noise variable.

29  
30 To quantify the linear direct causal effect Wright’s method (Wright (1921), Wright (1934), Runge et al  
31 (2015)) is used, which only applies in the linear case. Direct causal effects  $\alpha_{X_i, X_j, \tau}$  are estimated as the  
32 partial regression slopes of the multiple linear regression of  $X_j(t)$  on its parents  $pa(X_j(t))$ . This allows to  
33 control for any source of confounding. The total causal effect  $X$  on  $Y$  can then be estimated through:

$$34 \quad \beta_{X, Y, \tau} = \sum_{\substack{\text{causal paths} \\ \text{from } X(t-\tau) \\ \text{to } Y(t)}} \left( \prod_{\substack{X_i \rightarrow X_j \\ \text{arrow in} \\ \text{path for } \tau}} \alpha_{X_i, X_j, \tau} \right)$$

35  
36  
37 The freely available python package tigramite (<https://github.com/jakobrunge/tigramite>) was used for the  
38 causal effect quantification. To compare causal effects along different mediating paths, the effect variables  
39 were standardised before the causal analysis, by subtracting the mean and dividing the anomalies by the  
40 standard deviation.  $\tau = 0$  is assumed for the full analysis, to prevent the influence of long distance spatial  
41 effects. Uncertainties of  $\alpha_{X_i, X_j, 0}$  were estimated using a bootstrapping method with 500 members.

1 **SI figures:**

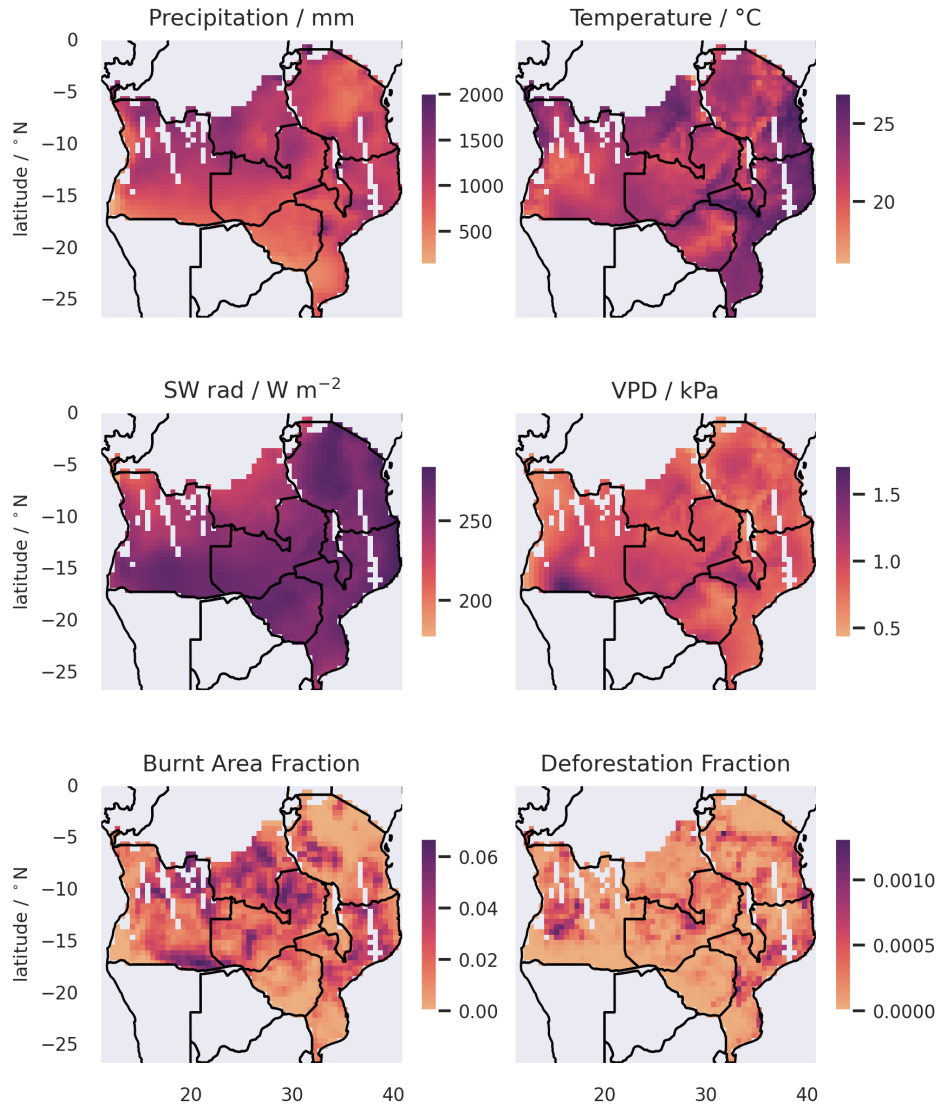

2

3 Figure S 1. Mapping of annual mean climate and disturbance drivers over the study period (2006-2017)  
4 across the SAW region. See text for data sources. Blanks relate to areas not analysed due to earth  
5 observation gaps in the biomass data.

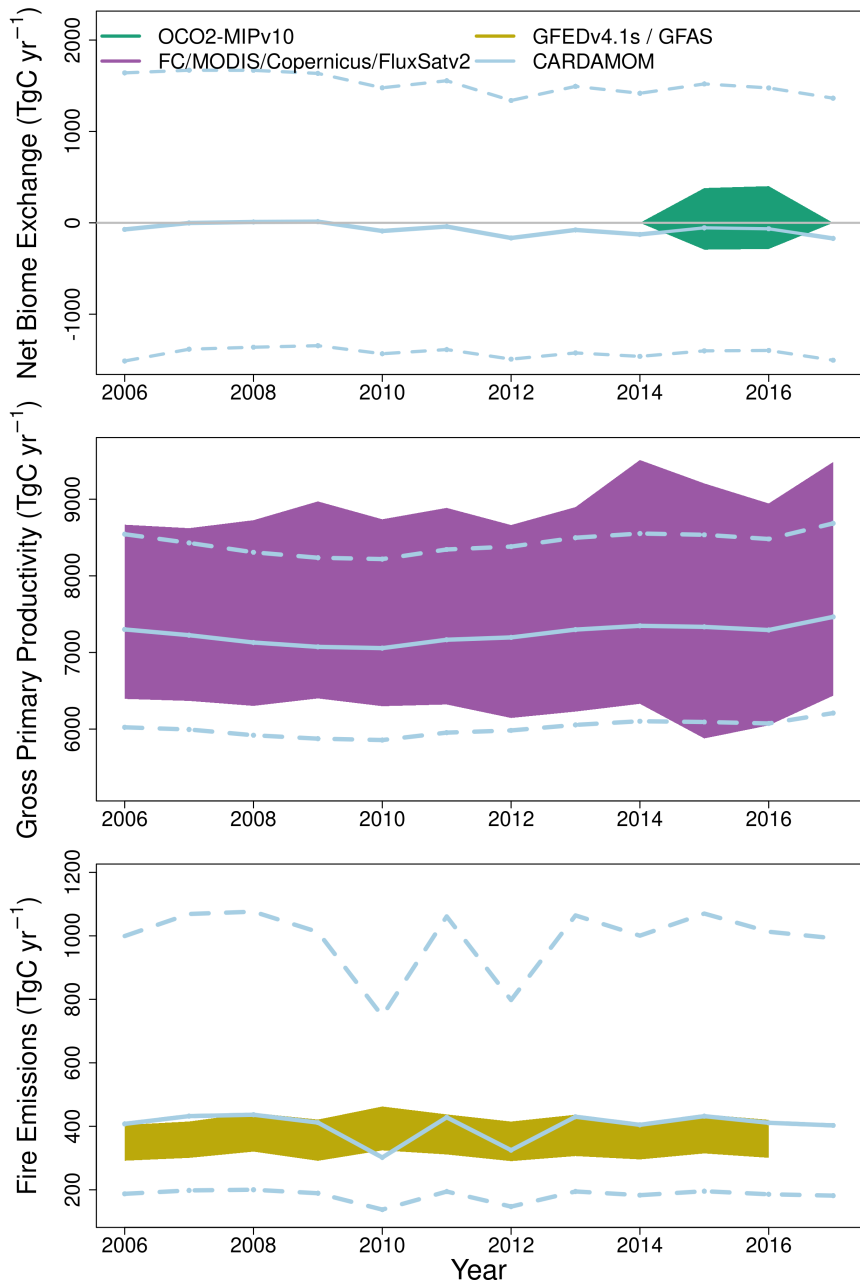

1  
 2 Figure S 2. A comparison of CARDAMOM analyses of major C fluxes (top NBE; middle GPP; bottom fire  
 3 emissions) against alternative data sources (see legend in top panel) for the SAW region. CARDAMOM  
 4 estimates are shown in blue; solid line for the median estimate and dashed lines for the 95% confidence  
 5 intervals.

1

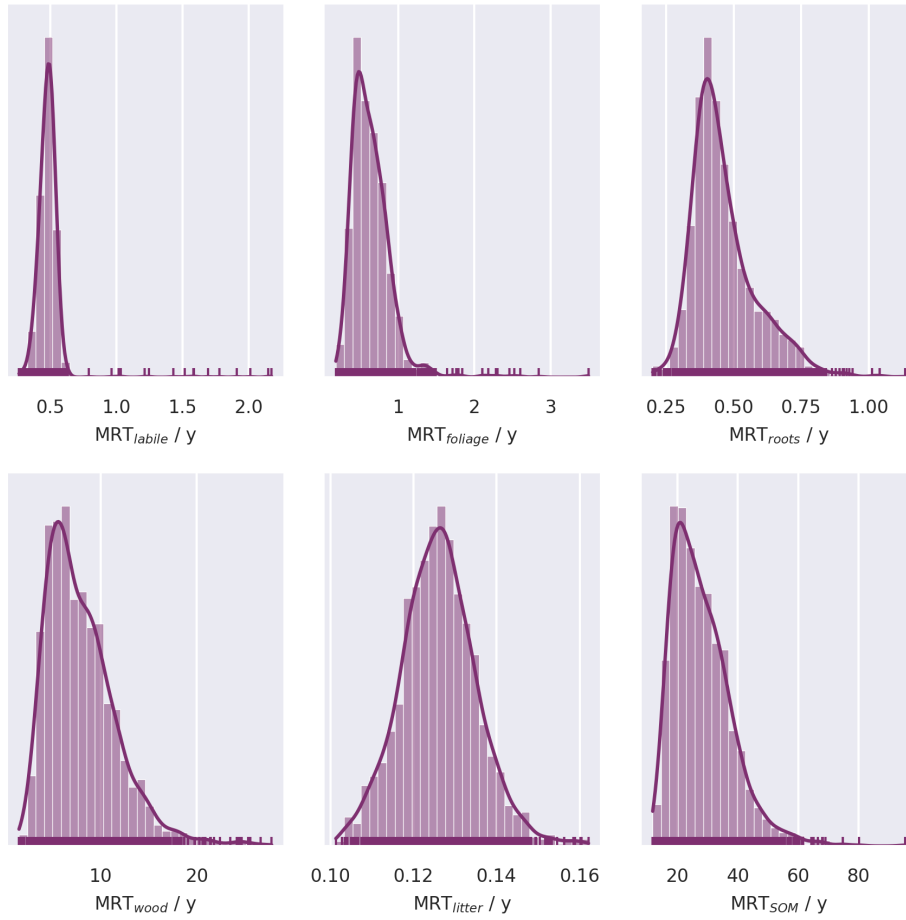

2

3 Figure S 3. Probability distributions of mean residence times (MRT) for vegetation and dead organic C  
4 pools across the SAW region at 0.5° resolution, across 2006-2017, as determined by diagnostic analysis.

5

1

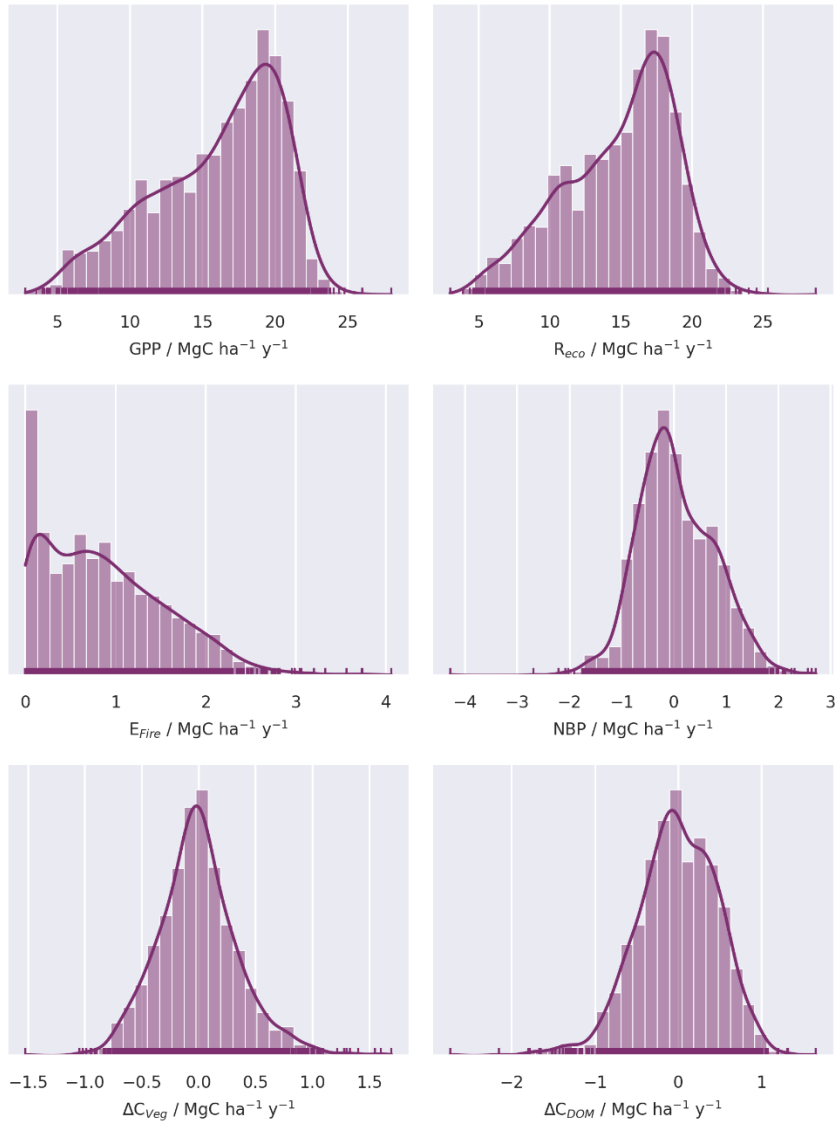

2

3

4 Figure S 4. Probability distributions of median gross fluxes, NBP and C stock changes across the SAW

5 region at 0.5° resolution, 2006-2017, as determined by diagnostic analysis

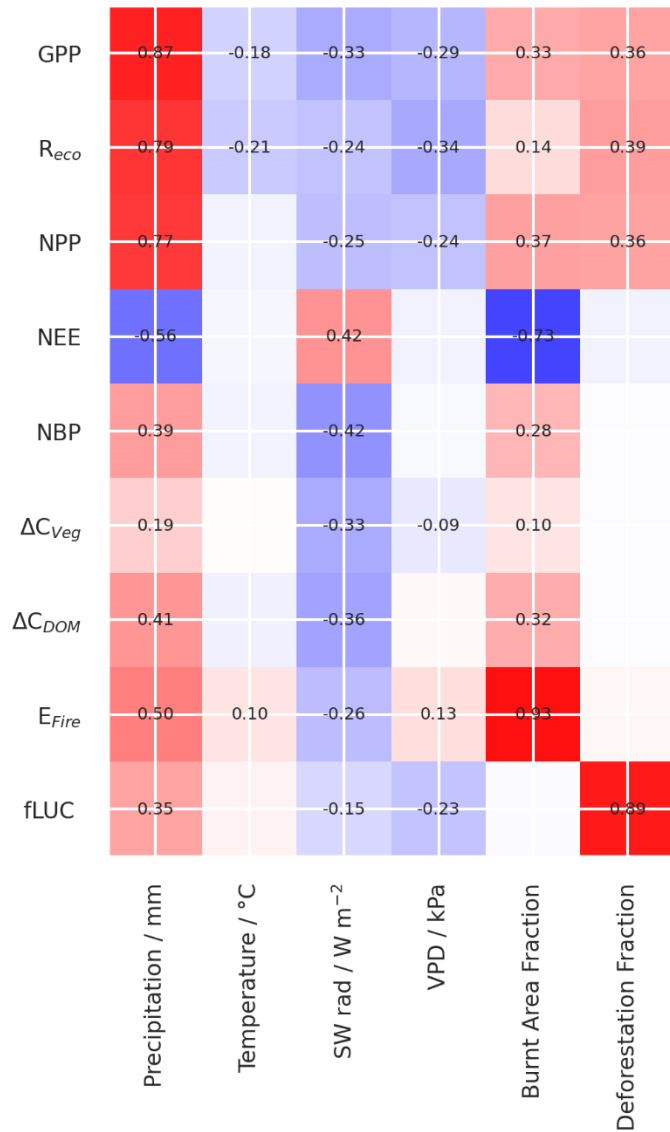

1  
 2 Figure S 5. Correlations between mean biosphere-atmosphere fluxes (annual medians) across SAW and  
 3 external forcing factors. Colours indicate positive (red) and negative (blue) correlations, with intensity  
 4 linked to magnitude of the correlation coefficient. SW rad is short wave radiation. Correlation coefficients  
 5 are only reported when the correlation is statistically significant ( $p < 0.001$ ).

6  
 7

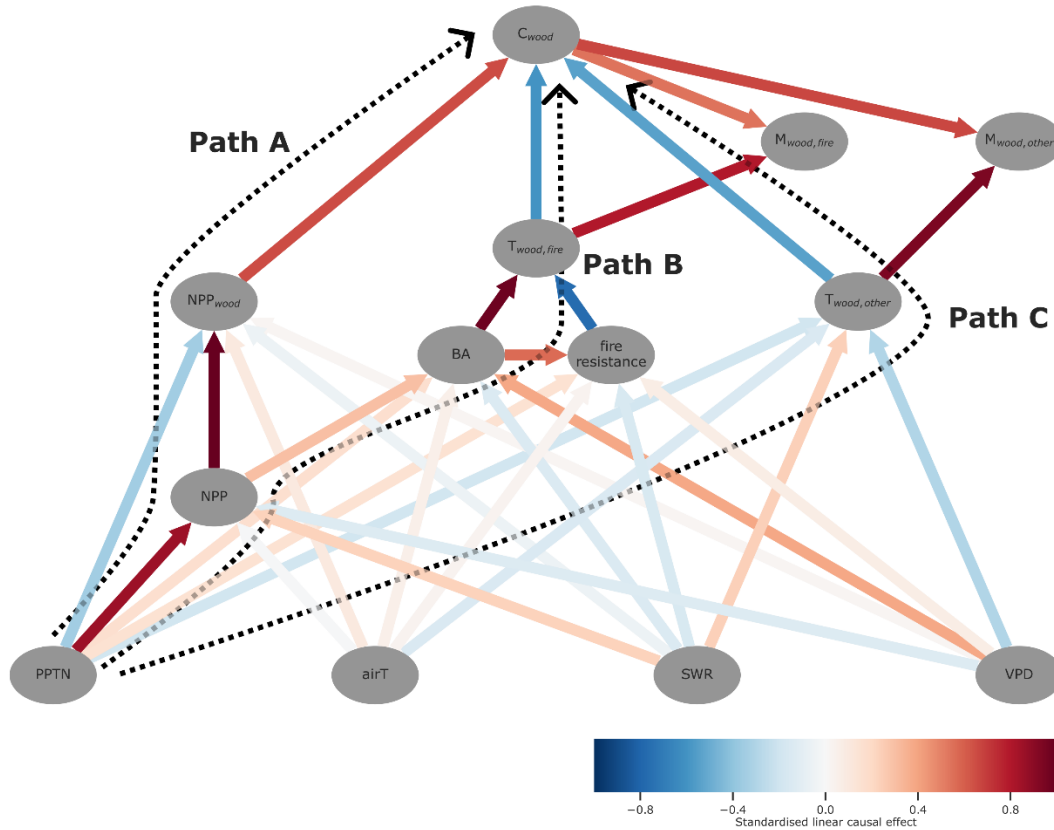2  
3

4 Figure S 6. Causal graph of direct linear causal effect resolving the influence of environmental drivers on  
 5 the spatial distribution of relative mortality rates and C<sub>wood</sub> stocks (RQ2). Causal effects were estimated  
 6 using Wright's path approach. Nodes depict causal variables, arrows show the direction of the direct causal  
 7 effect, and the colour of the arrows indicates the sign of the direct causal effect (red: positive, blue:  
 8 negative). To aid interpretation of the causal graph, we break down the overall causal effect of a given  
 9 driver on the spatial distribution of C<sub>wood</sub>, we break the overall causal effect into three mediating pathways,  
 10 representing the total standardised linear effect mediated of a given driver on C<sub>wood</sub> via: (A) woody  
 11 productivity, NPP<sub>wood</sub>, (B) turnover driven by fire, T<sub>wood,fire</sub>, and (C) via non-fire turnover, T<sub>wood,other</sub>. The  
 12 dotted arrows illustrate these causal pathways for the precipitation driver (PPTN). The total standardised  
 13 linear effects mediated along these paths are used to summarise the causal effects in Figure 7.

14



1

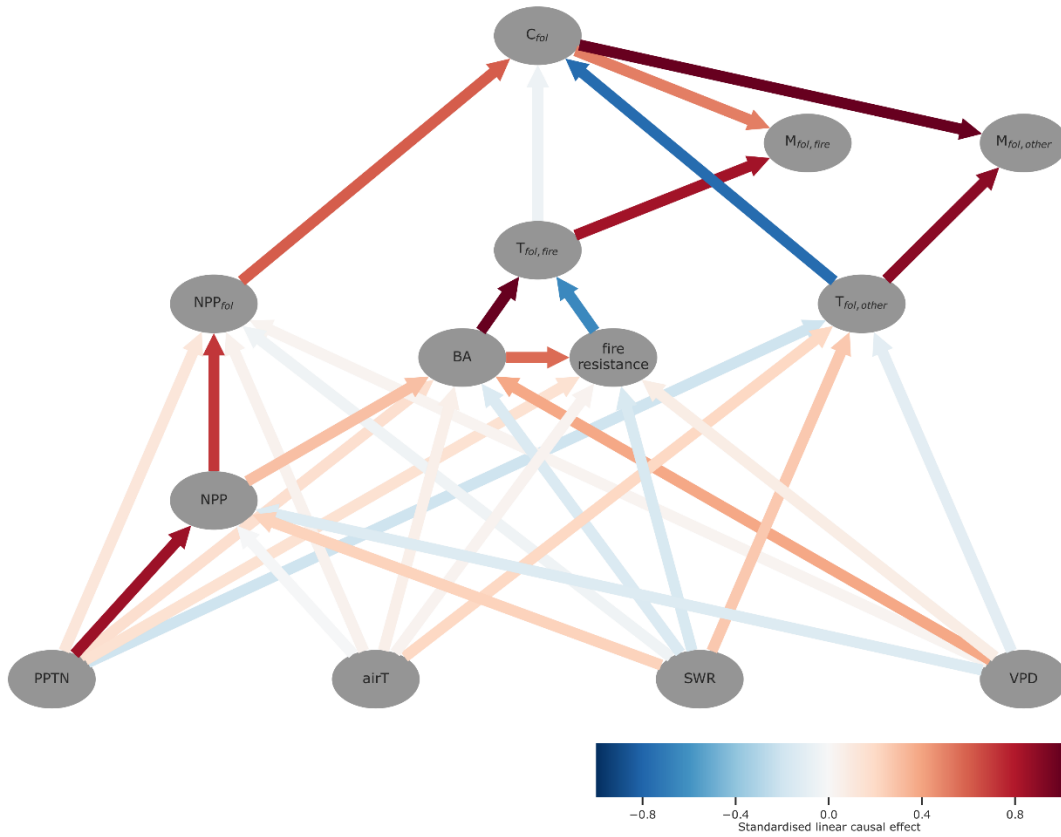

2

3 Figure S 7. Causal graph of direct linear causal effect resolving the influence of environmental drivers on  
4 the spatial distribution of relative mortality rates and foliage C stocks ( $C_{\text{foliage}}$ ) (RQ2). Causal effects were  
5 estimated using Wright's path approach. Nodes depict causal variables, arrows show the direction of the  
6 direct causal effect, and the colour of the arrows indicates the sign of the direct causal effect (red: positive,  
7 blue: negative). Non-fire mortality (i.e. phenology) has a stronger impact on turnover of the foliage pool.

8

9

10

11

1

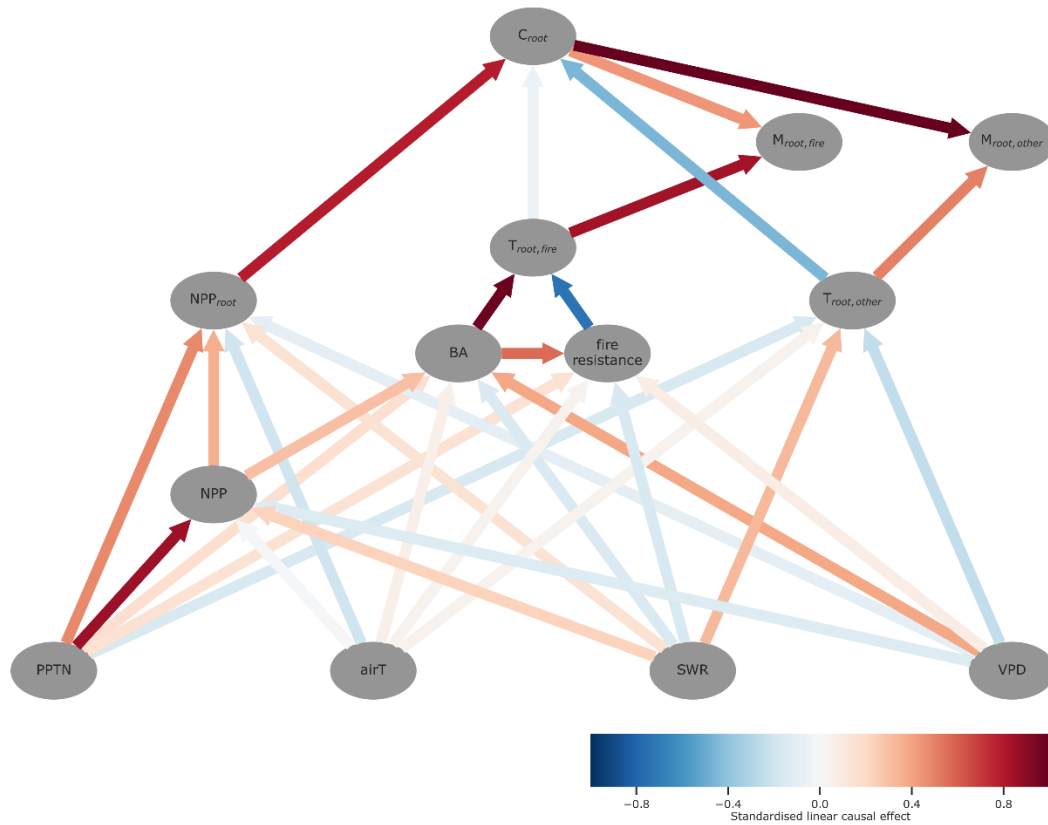

2

3 Figure S 8. Causal graph of direct linear causal effect resolving the influence of environmental drivers on  
4 the spatial distribution of relative mortality rates and fine root C stocks ( $C_{\text{roots}}$ ) (RQ2). Causal effects were  
5 estimated using Wright's path approach. Nodes depict causal variables, arrows show the direction of the  
6 direct causal effect, and the colour of the arrows indicates the sign of the direct causal effect (red: positive,  
7 blue: negative). Non-fire mortality (i.e. phenology) has a stronger impact on turnover of the fine roots pool.

8

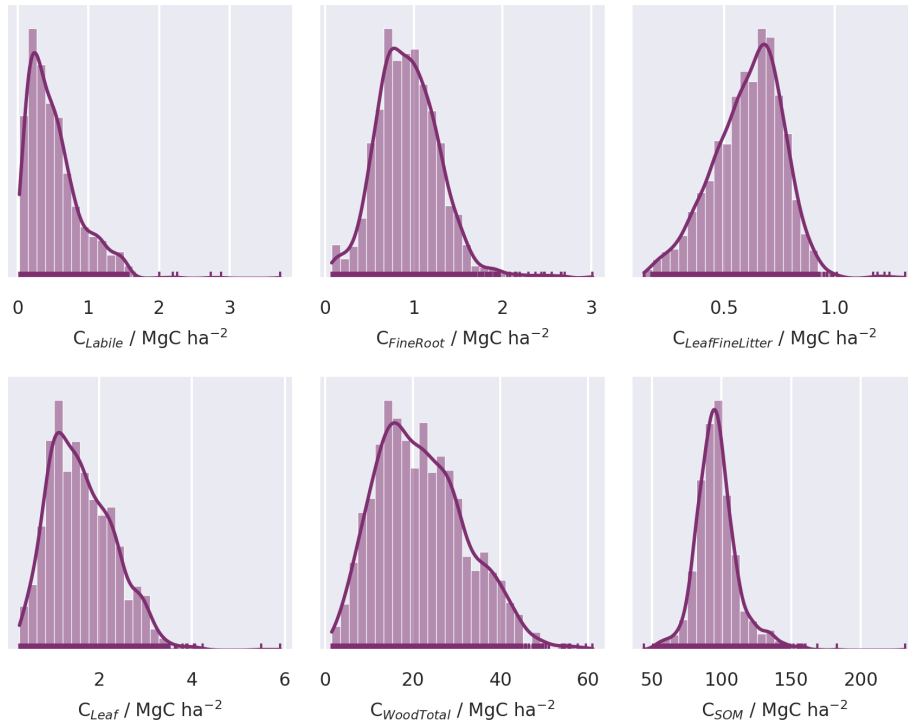

1  
2

3 Figure S 9. Probability distributions of live and dead C pools across the SAW region at 0.5° resolution,  
4 2006-2017, as determined by diagnostic analysis.

1

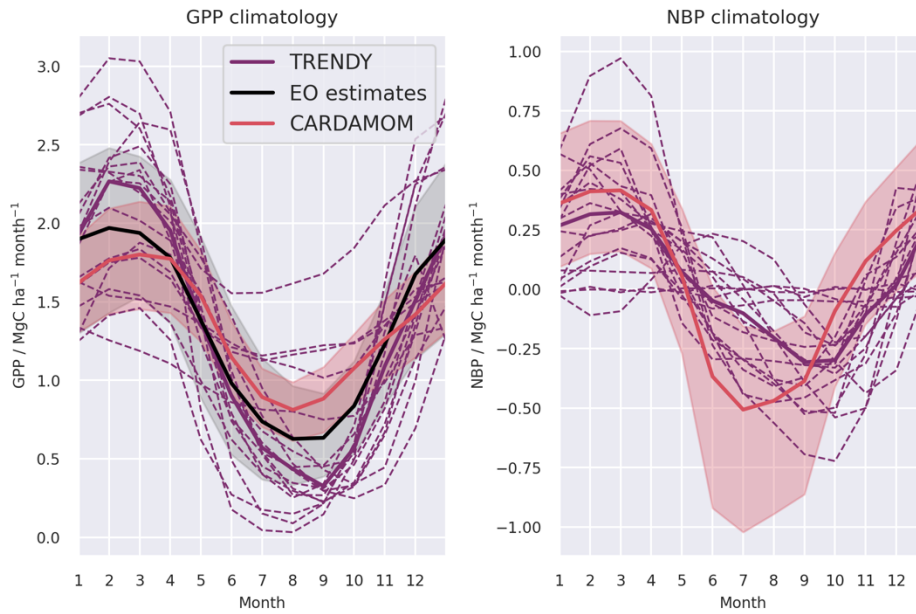

2

3 Figure S 10 Comparison of estimated climatologies (mean seasonal cycles) for gross primary production  
4 (left) and net biome production (right) over the SAW region 2006-2017. The mean of the Trendy ensemble  
5 (solid line) and individual Trendy models (dashed lines) are compared to CARDAMOM (with a 95%  
6 confidence interval, red shading). The GPP panel also includes the mean (solid line) and range (shaded  
7 area) for the GPP climatology derived from four earth observation orientated GPP products.

8

9

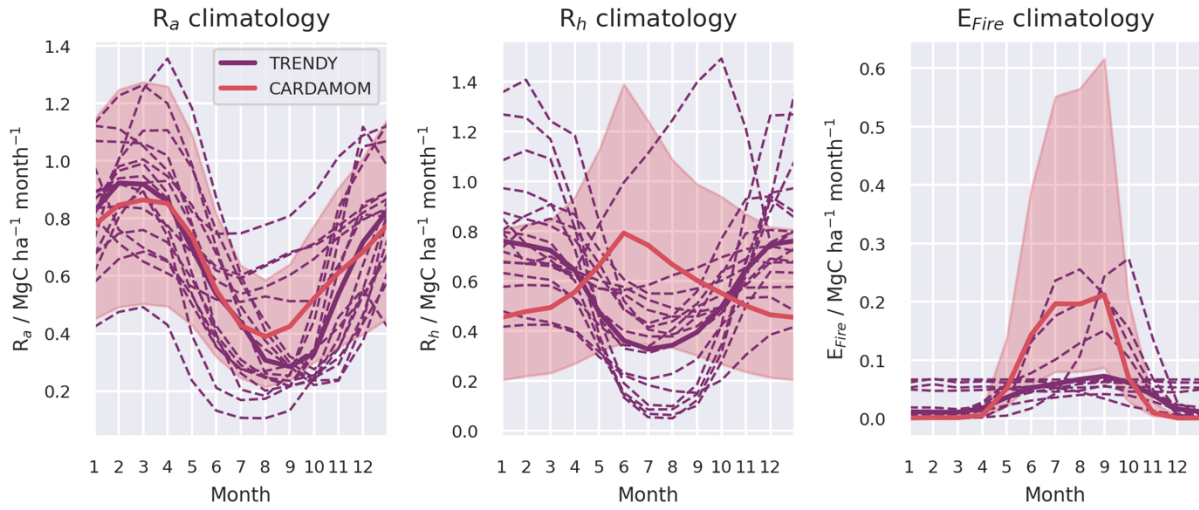

1  
 2 Figure S 11. Mean annual climatologies for main emissions sources from SAW as estimated by  
 3 CARDAMOM analysis (orange line = median, shading for 95% confidence intervals) and Trendy (purple  
 4 line =ensemble mean, dashed lines are individual models).  $R_a$  is autotrophic respiration,  $R_h$  is heterotrophic  
 5 respiration,  $E_{\text{Fire}}$  is fire-related C emissions.

1

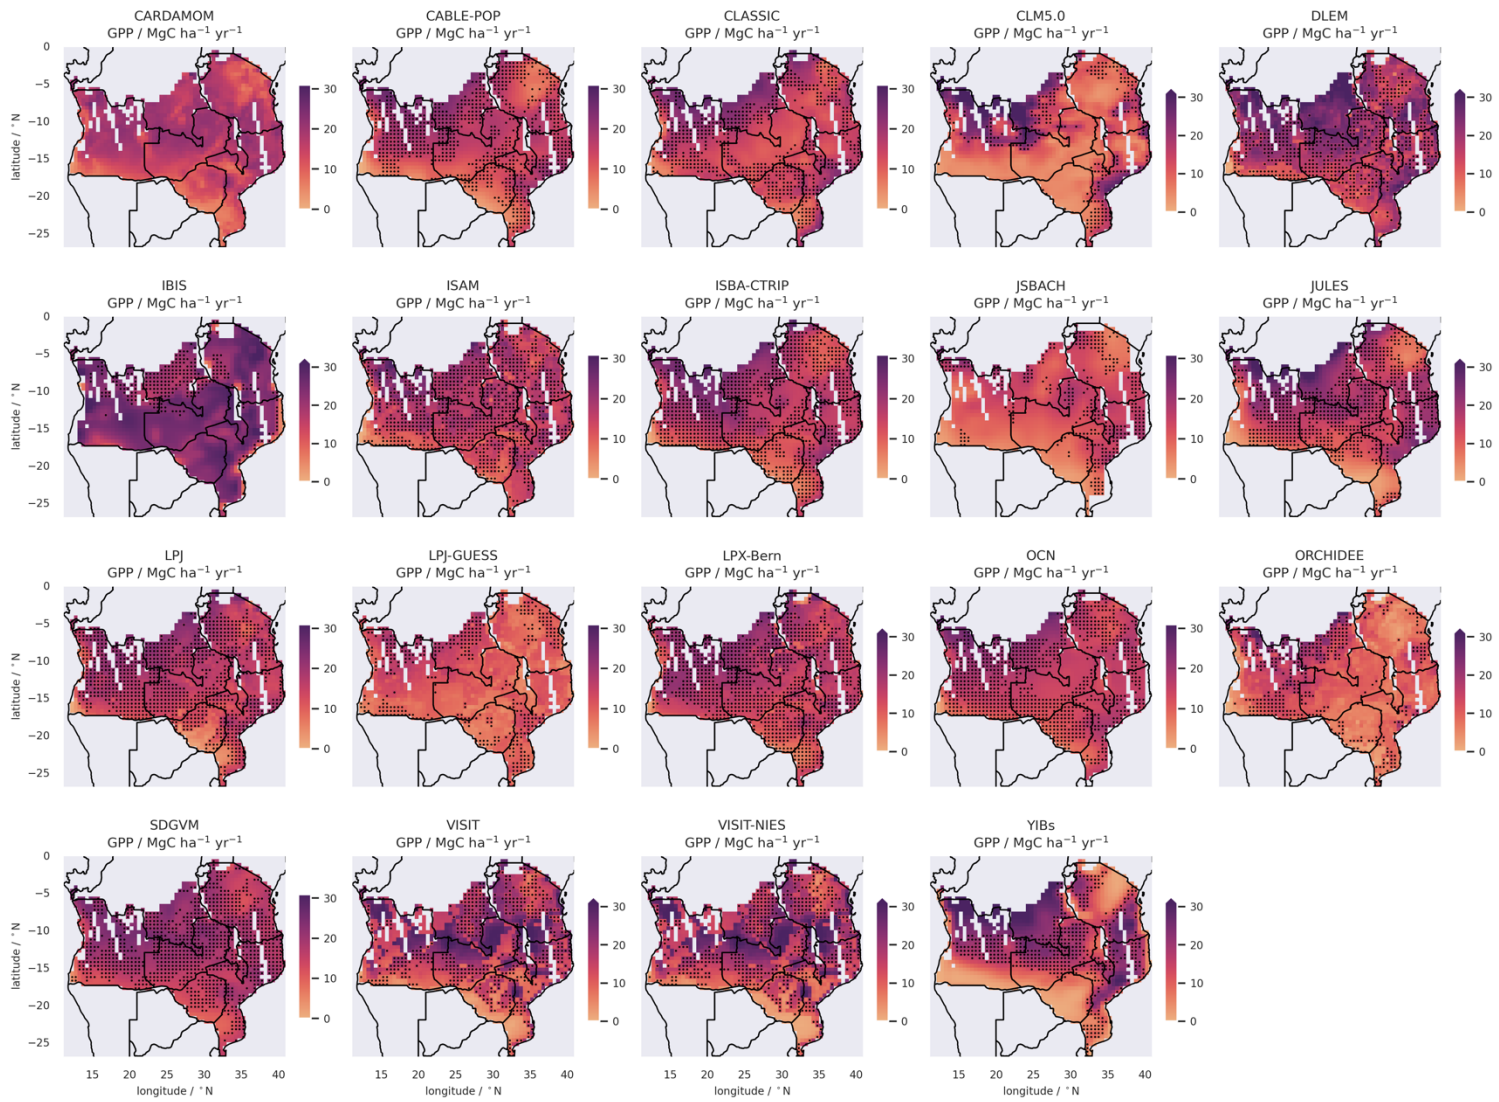

2

- 1 Figure S 12. Time-averaged GPP (2006-2017) simulated by CARDAMOM and the TRENDY LSMs. Stippling indicates that the time-averaged
- 2 LSM estimates fall within the 95% CI of the data-constrained CARDAMOM estimate.

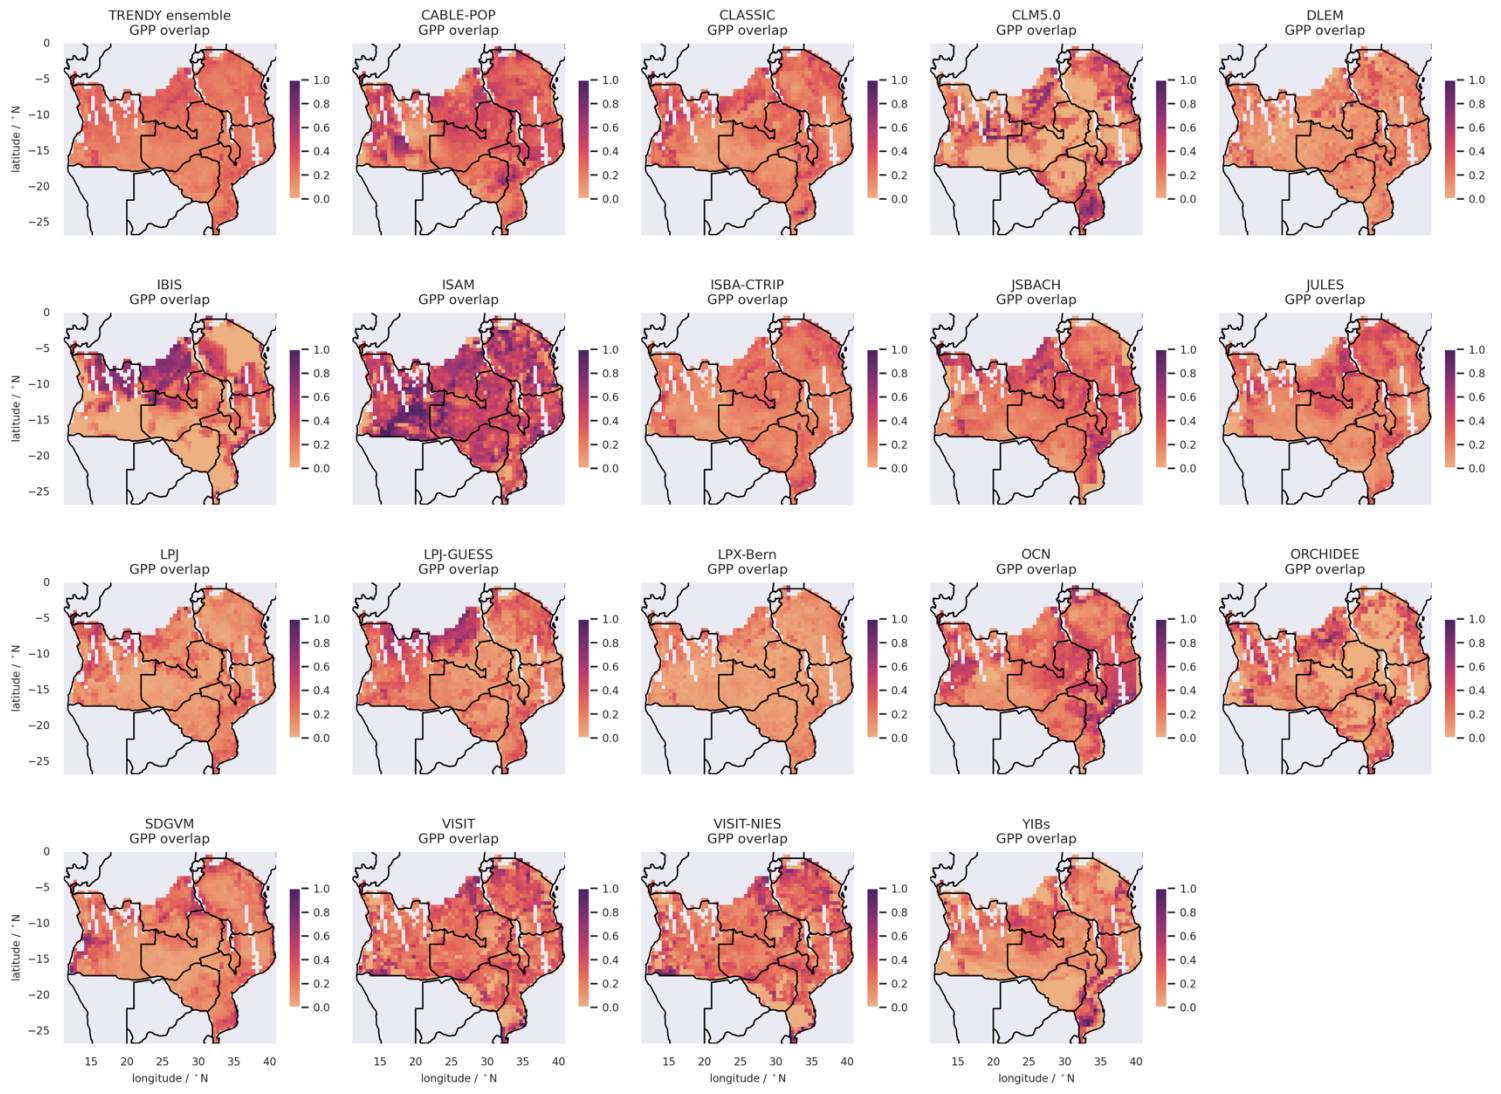

1



1 Figure S 13. Average overlap fraction (fraction of time per pixel for which flux estimate falls within 95% CI from CARDAMOM) for GPP, averaged  
2 across all TRENDY LSMs, and for each of the individual LSMs.

3

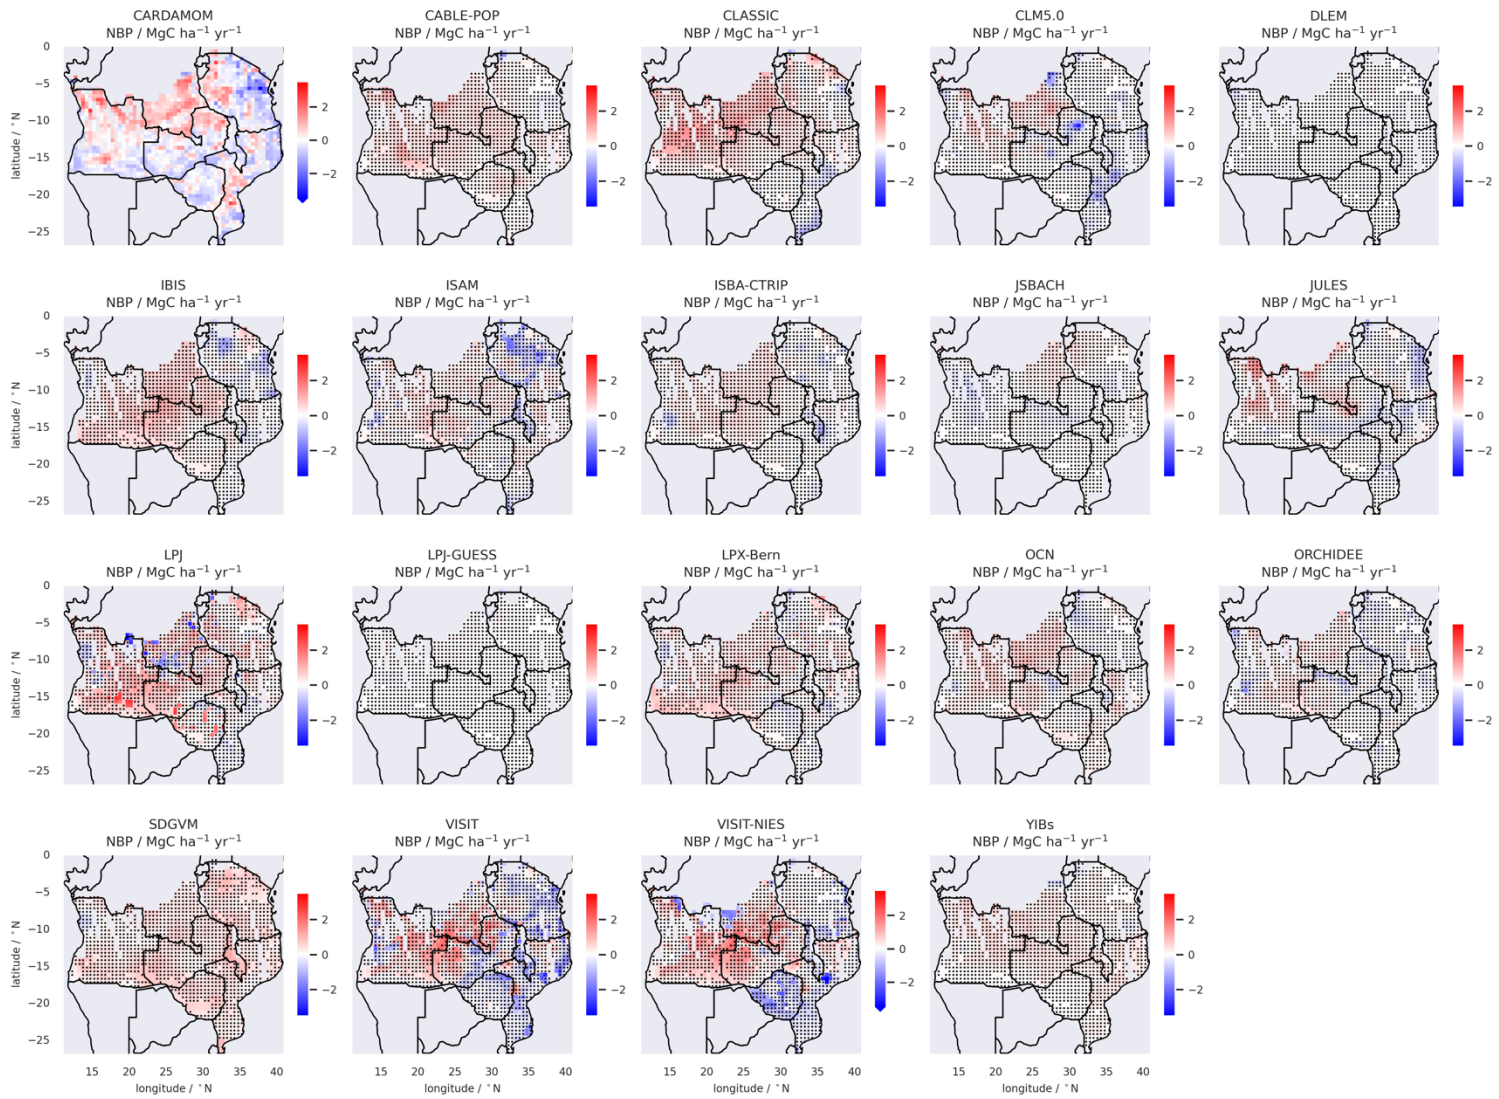

- 1 Figure S 14. Time-averaged NBP (2006-2017) simulated by CARDAMOM and the TRENDY LSMs. Stippling indicates that the time-averaged
- 2 LSM estimates fall within the 95% CI of the data-constrained CARDAMOM estimate.

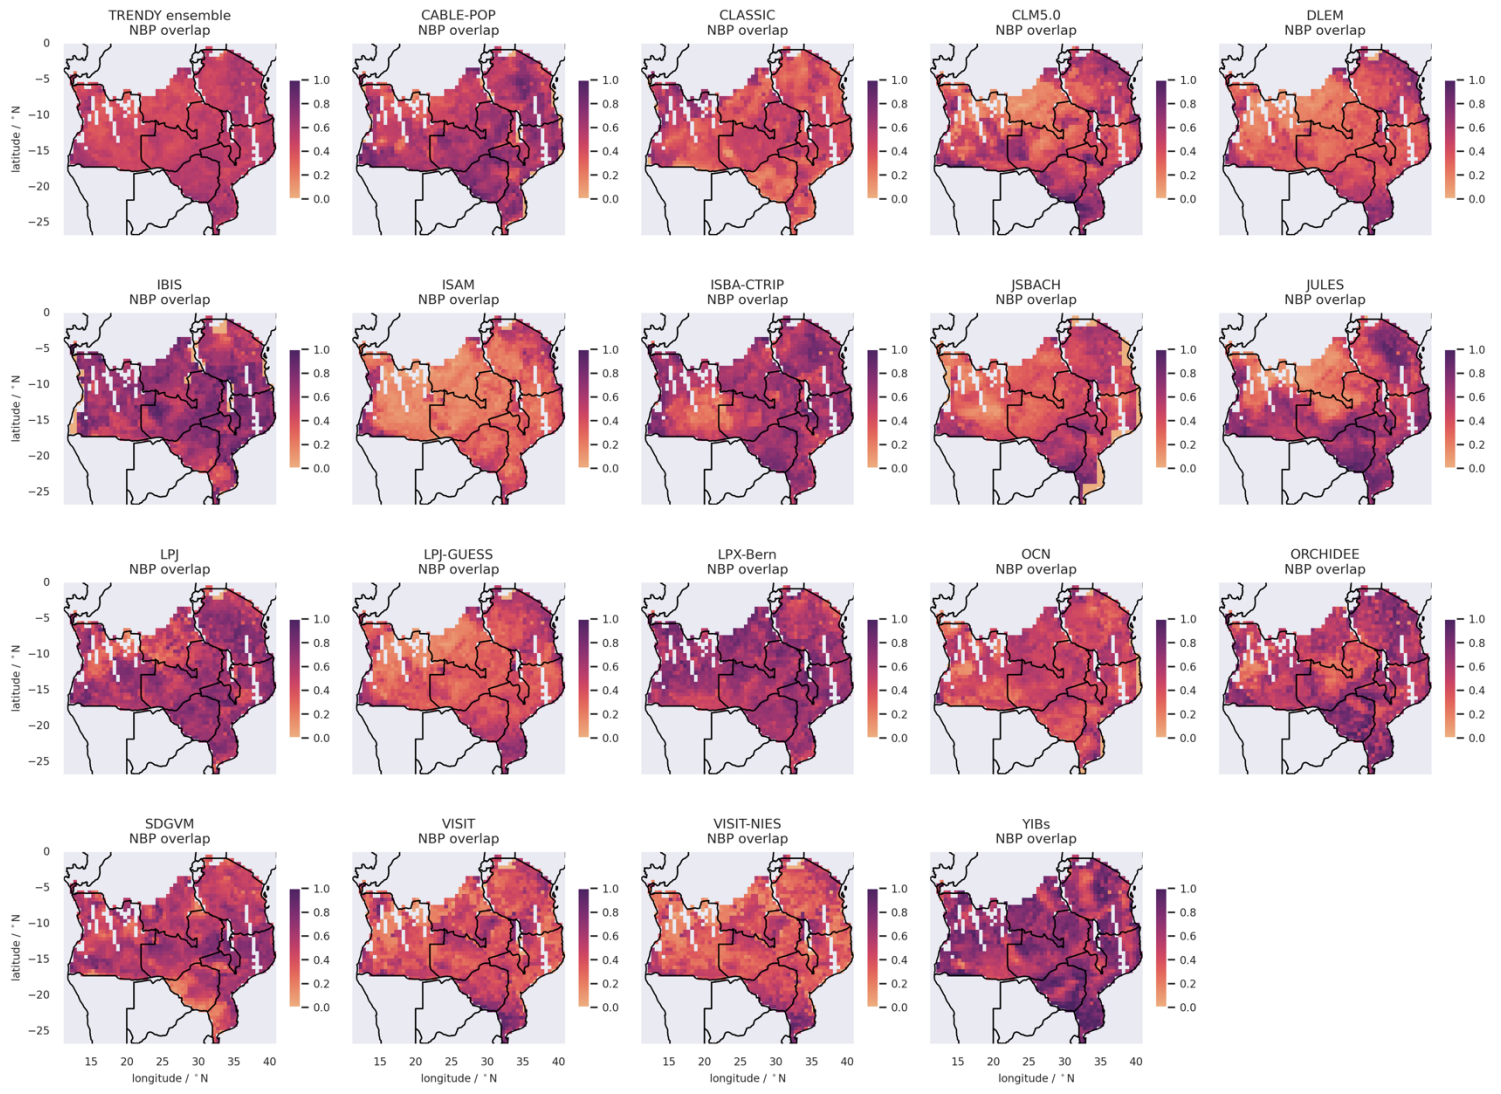

1 Figure S 15. Average overlap fraction (fraction of time per pixel for which flux estimate falls within 95% CI from CARDAMOM) for NBP, averaged  
2 across all TRENDY LSMs, and for each of the individual LSMs.

3

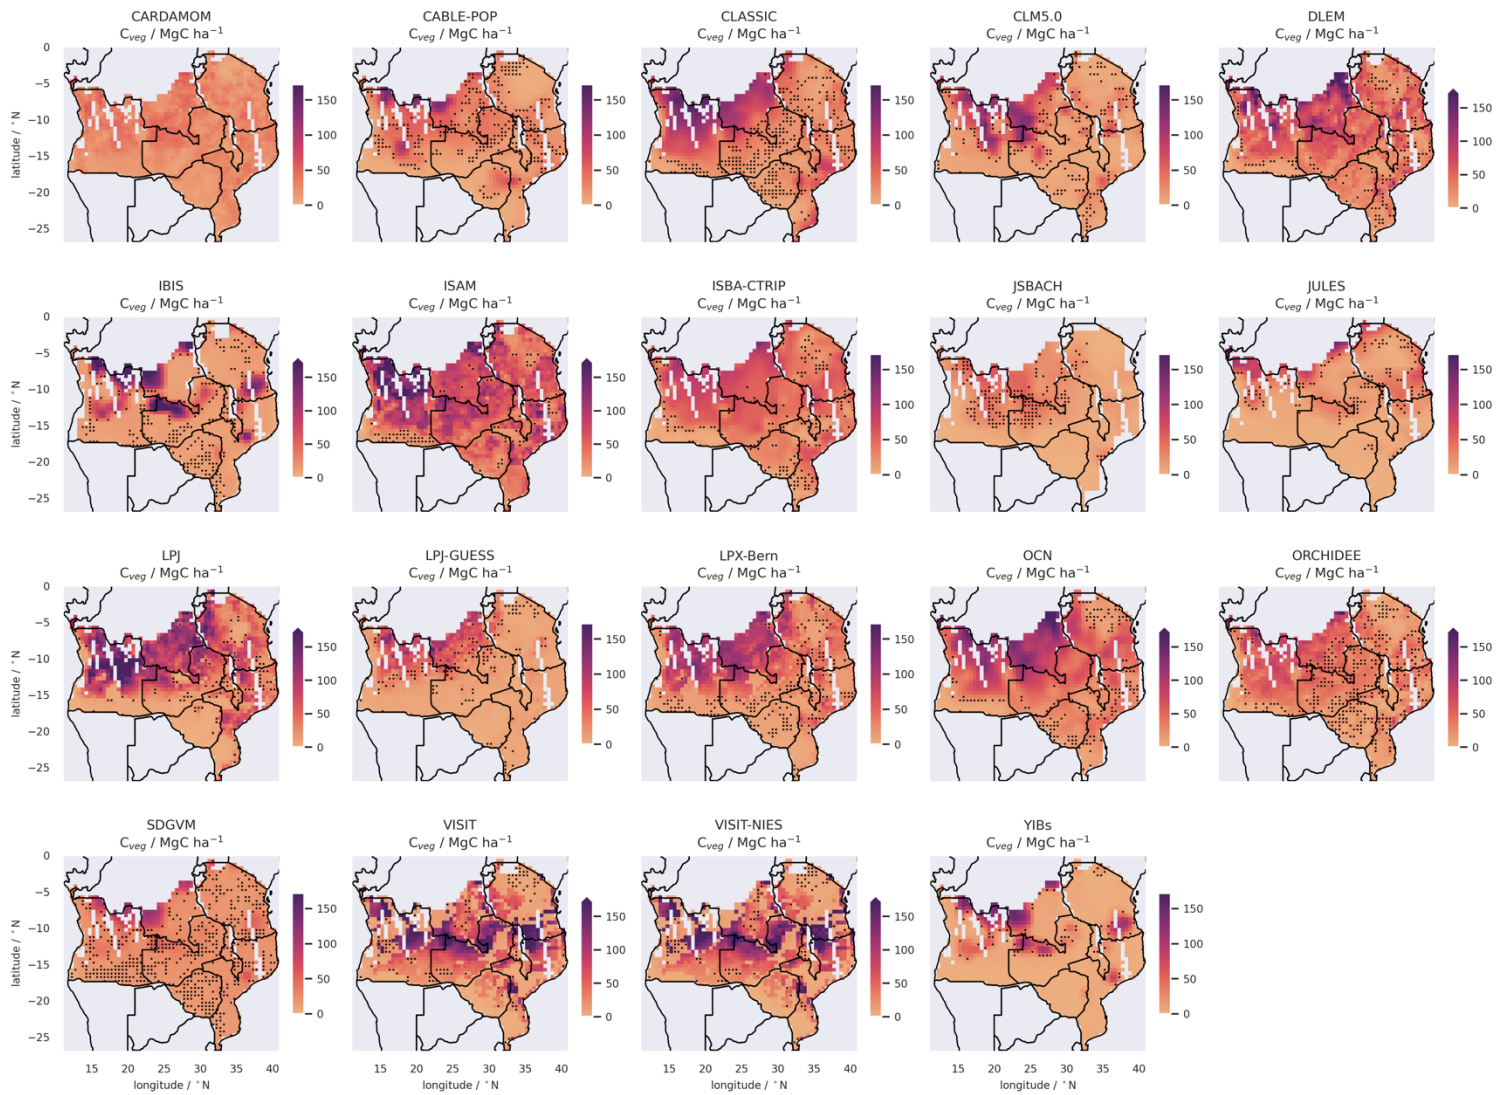

1

1 Figure S 16. Time-averaged live vegetation C stock (2006-2017) across the SAW simulated by CARDAMOM and the TRENDY LSMs. Stippling  
2 indicates that the time-averaged C stocks for a given LSM fall within the 95% CI of the data-constrained CARDAMOM estimate.

3

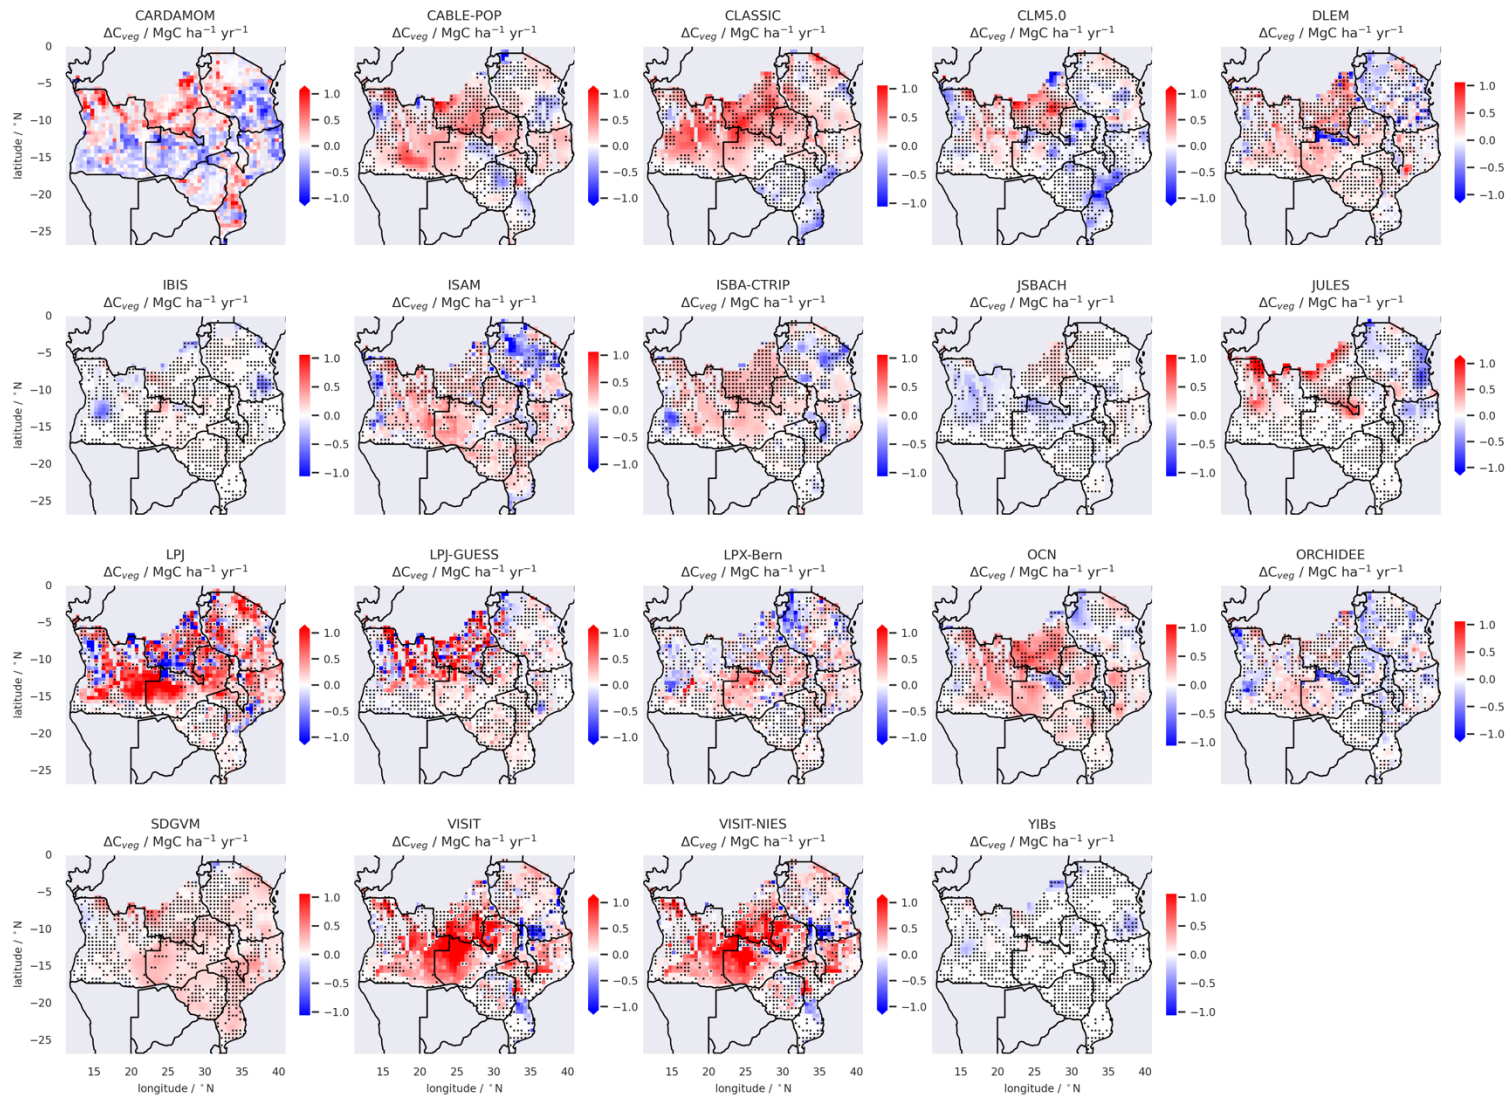

1  
 2 Figure S 17. Time-averaged rate of change in the live vegetation C stock (2006-2017) simulated by CARDAMOM and the TRENDY LSMs.  
 3 Stippling indicates that the time-averaged LSM estimates fall within the 95% CI of the data-constrained CARDAMOM estimate.



1  
2

| Model                                                                 | CARDAMOM<br>median<br>(95% CI) | Trendy<br>median<br>(range) | CABLE-<br>POP* | CLASS<br>IC  | CLM5.0       | DLEM*        | IBIS        | ISAM*        | ISBA-<br>CTRIP | JSBACH       | JULES        | LPJ          | LPJ-<br>GUESS | LPX-<br>Bern | OCN*         | ORCHI<br>DEE* | SDGVM        | VISIT        | VISIT-<br>NIES | YIBs*        | EO<br>estimates<br>mean<br>(range) |
|-----------------------------------------------------------------------|--------------------------------|-----------------------------|----------------|--------------|--------------|--------------|-------------|--------------|----------------|--------------|--------------|--------------|---------------|--------------|--------------|---------------|--------------|--------------|----------------|--------------|------------------------------------|
| <b>Cveg</b><br>(MgC ha <sup>-1</sup> )                                | 26 (22-31)                     | 37<br>(15-66)               | <b>26</b>      | 43           | <b>27</b>    | 48           | 32          | 66           | 43             | 15           | 17           | 55           | 21            | 42           | 51           | 32            | <b>26</b>    | 51           | 51             | 17           | -                                  |
| <b>Cdom</b><br>(MgC ha <sup>-1</sup> )                                | 98 (58-142)                    | 93<br>(31-194)              | <b>75</b>      | <b>102</b>   | <b>59</b>    | <b>77</b>    | <b>84</b>   | <b>93</b>    | <b>98</b>      | 31           | <b>137</b>   | <b>81</b>    | <b>101</b>    | 194          | <b>111</b>   | <b>72</b>     | <b>92</b>    | 154          | <b>93</b>      | <b>90</b>    | -                                  |
| <b>GPP</b><br>(MgC ha <sup>-1</sup> y <sup>-1</sup> )                 | 16.00<br>(13.06-<br>18.73)     | 15.78<br>(10.52-<br>23.22)  | <b>14.59</b>   | <b>15.17</b> | 12.13        | 19.33        | 23.2<br>2   | <b>16.00</b> | <b>15.99</b>   | 11.56        | <b>15.76</b> | <b>15.80</b> | 10.52         | <b>16.15</b> | <b>15.49</b> | 10.62         | <b>17.94</b> | <b>17.11</b> | <b>16.98</b>   | <b>14.88</b> | <b>15.69</b><br>(10.63-<br>20.76)  |
| <b>GPP<br/>seasonality</b><br>(MgC ha <sup>-1</sup> y <sup>-1</sup> ) | 10.38                          | 17.96<br>(5.66-<br>31.85)   | 18.22          | 23.39        | 5.66         | 31.25        | 8.02        | 5.77         | 23.59          | 14.25        | 20.78        | 26.14        | 14.33         | 31.85        | 17.70        | 14.64         | 28.28        | 7.14         | 6.29           | 20.08        | 15.23                              |
| <b>NBP</b><br>(MgC ha <sup>-1</sup> y <sup>-1</sup> )                 | 0.05<br>(-1.69-1.64)           | 0.14 (-<br>0.04-<br>0.39)   | <b>0.26</b>    | <b>0.35</b>  | <b>-0.00</b> | <b>-0.04</b> | <b>0.25</b> | <b>0.04</b>  | <b>0.12</b>    | <b>0.02</b>  | <b>0.07</b>  | <b>0.32</b>  | <b>-0.00</b>  | <b>0.20</b>  | <b>0.18</b>  | <b>0.02</b>   | <b>0.39</b>  | <b>0.04</b>  | <b>0.16</b>    | <b>0.19</b>  | -                                  |
| <b>NBP<br/>seasonality</b><br>(MgC ha <sup>-1</sup> y <sup>-1</sup> ) | 10.20                          | 5.96<br>(-1.97-<br>16.56)   | 9.77           | 16.56        | 1.51         | 0.04         | 10.3<br>3   | -1.97        | 11.98          | 3.07         | 4.58         | 5.45         | 0.01          | 8.58         | 7.02         | 6.47          | 10.08        | 1.97         | 0.98           | 10.19        | -                                  |
| <b>E<sub>fire</sub></b><br>(MgC ha <sup>-1</sup> y <sup>-1</sup> )    | 0.89 (0.36-<br>2.52)           | 0.72<br>(0.31-<br>1.04)     | -              | 1.04         | 0.87         | -            | NA          | -            | 1.04           | 0.32         | 0.72         | 0.75         | 0.58          | 0.65         | -            | -             | 0.80         | 0.46         | 0.31           | -            | -                                  |
| <b>ΔCveg</b><br>(MgC ha <sup>-1</sup> y <sup>-1</sup> )               | -0.00<br>(-0.38-0.36)          | 0.06<br>(-0.02-<br>0.24)    | <b>0.12</b>    | <b>0.19</b>  | <b>-0.01</b> | <b>0.05</b>  | <b>0.00</b> | <b>0.06</b>  | <b>0.07</b>    | <b>-0.02</b> | <b>0.05</b>  | <b>0.21</b>  | <b>0.10</b>   | <b>0.03</b>  | <b>0.13</b>  | <b>-0.02</b>  | <b>0.14</b>  | <b>0.23</b>  | <b>0.24</b>    | <b>-0.01</b> | -                                  |
| <b>ΔCdom</b><br>(MgC ha <sup>-1</sup> y <sup>-1</sup> )               | -0.01<br>(-1.51-1.44)          | 0.06 (-<br>0.03-<br>0.30)   | <b>0.09</b>    | <b>0.06</b>  | <b>-0.02</b> | <b>0.02</b>  | <b>0.10</b> | <b>-0.03</b> | <b>-0.01</b>   | <b>0.02</b>  | <b>-0.02</b> | <b>0.09</b>  | <b>0.00</b>   | <b>0.11</b>  | <b>0.05</b>  | <b>0.01</b>   | <b>0.09</b>  | <b>0.30</b>  | <b>0.21</b>    | <b>0.16</b>  | -                                  |

3 Table S1: Summary comparison of key components of the terrestrial C cycle for the SAW region estimated by CARDAMOM and the Trendy v11  
4 models regarding. Values indicate spatially and temporally averaged estimates. Models marked with a \* are members of the Trendy v11 ensemble  
5 that do not include process representation of fire. Seasonality is the absolute difference in fluxes between the wet (JFM) and dry (JAS) season  
6 months.

| Model                           | Trendy | CABLE-POP* | CLASSIC | CLM5.0 | DLEM* | IBIS | ISAM* | ISBA-CTRIIP | JSBACH | JULES | LPI  | LPI-GUESS | LPX-Bern | OCN* | ORCHIDEE* | SDGVM | VISIT | VISIT-NIES | YIBs* | Overlap category |
|---------------------------------|--------|------------|---------|--------|-------|------|-------|-------------|--------|-------|------|-----------|----------|------|-----------|-------|-------|------------|-------|------------------|
| <b>Cveg overlap</b>             | 0.14   | 0.21       | 0.22    | 0.13   | 0.12  | 0.17 | 0.07  | 0.12        | 0.12   | 0.10  | 0.07 | 0.10      | 0.15     | 0.13 | 0.25      | 0.35  | 0.08  | 0.08       | 0.05  | A                |
| <b>Cdom overlap*</b>            | 0.62   | 0.72       | 0.80    | 0.25   | 0.74  | 0.92 | 0.83  | 0.93        | 0.00   | 0.47  | 0.85 | 0.78      | 0.14     | 0.86 | 0.64      | 0.88  | 0.37  | 0.69       | 0.34  | A                |
| <b>GPP Overlap</b>              | 0.23   | 0.31       | 0.22    | 0.19   | 0.15  | 0.22 | 0.48  | 0.20        | 0.26   | 0.22  | 0.16 | 0.22      | 0.10     | 0.27 | 0.17      | 0.20  | 0.27  | 0.26       | 0.17  | B                |
| <b>NBP Overlap</b>              | 0.49   | 0.57       | 0.42    | 0.44   | 0.38  | 0.64 | 0.29  | 0.59        | 0.41   | 0.51  | 0.60 | 0.39      | 0.64     | 0.45 | 0.57      | 0.53  | 0.42  | 0.39       | 0.68  | B                |
| <b>E<sub>fire</sub> overlap</b> | 0.11   | 0.00       | 0.20    | 0.34   | -     | -    | -     | 0.22        | 0.16   | 0.21  | 0.17 | 0.16      | 0.15     | -    | -         | 0.15  | 0.14  | 0.13       | -     | B                |
| <b>ΔCveg Overlap</b>            | 0.53   | 0.53       | 0.48    | 0.57   | 0.56  | 0.60 | 0.51  | 0.57        | 0.59   | 0.59  | 0.39 | 0.50      | 0.52     | 0.52 | 0.54      | 0.56  | 0.45  | 0.44       | 0.63  | C                |
| <b>ΔCdom Overlap</b>            | 0.96   | 0.96       | 0.97    | 0.98   | 0.98  | 0.93 | 0.98  | 0.98        | 0.93   | 0.98  | 0.94 | 0.98      | 0.94     | 0.95 | 0.98      | 0.96  | 0.91  | 0.92       | 0.97  | C                |

1 Table S2: Summary comparison of the consistency between key components of the terrestrial C cycle for the SAW region estimated by CARDAMOM  
2 and the Trendy v11 models regarding. Consistency is calculated based on the fraction of pixels (in space and time) for which the trendy estimate  
3 falls within the CARDAMOM 95% confidence interval. The column: Overlap category distinguishes components for which the overlap was  
4 estimated based on: (A) the annual estimates, (B) monthly estimates, and (C) time-integrated estimates. Models marked with a \* are members of  
5 the Trendy v11 ensemble that do not include process representation of fire.

1  
2
